# Supplementary material for: Analysis of Multiresidue Pesticides in Agricultural Paddy Soils Near Industrial Areas in Korea by GC–MS/MS and LC–MS/MS Using QuEChERS Extraction with dSPE Clean-Up
Source: MDPI journal article supplement (doi:10.3390/app11188415), 2021-09-10
Supplement: s1 [file s1]

Table S1. MRM conditions for the second 83 pesticides in the analysis of GC-MS/MS

| pesticides         | RT (min) | Precursor > product ion (CE, eV) |    |               |    |
|--------------------|----------|----------------------------------|----|---------------|----|
|                    |          | Quantifier ion                   |    | Qualifier ion |    |
| Difenoconazole-1   | 16.297   | 323.00>265.00                    | 18 | 265.00>202.10 | 18 |
| Difenoconazole-2   | 16.297   | 323.00>265.00                    | 18 | 265.00>202.10 | 18 |
| Dimethoate         | 7.665    | 229.00>87.10                     | 12 | 87.00>72.00   | 24 |
| Dimethylvinphos(E) | 8.908    | 295.00>109.10                    | 30 | 297.00>109.00 | 15 |
| Dimethylvinphos(Z) | 9.086    | 295.00>109.10                    | 24 | 297.00>109.10 | 24 |
| Diphenylamine      | 7.172    | 169.00>167.10                    | 27 | 168.00>166.20 | 30 |
| Disulfoton         | 8.064    | 142.00>109.00                    | 6  | 186.00>153.10 | 6  |
| Endosulfan alpha   | 10.175   | 241.00>205.90                    | 15 | 339.00>160.00 | 21 |
| Endosulfan beta    | 11.064   | 339.00>160.00                    | 18 | 339.00>267.00 | 9  |
| Endosulfan sulfate | 11.663   | 272.00>236.80                    | 18 | 272.00>234.70 | 15 |
| Endrin             | 10.885   | 263.00>192.90                    | 30 | 279.00>206.90 | 27 |
| EPN                | 12.495   | 169.00>77.10                     | 24 | 157.00>110.00 | 15 |
| Epoxiconazole      | 12.157   | 192.00>138.00                    | 15 | 192.00>111.00 | 27 |
| Ethalfuralin       | 7.205    | 276.00>202.00                    | 15 | 316.00>276.00 | 12 |
| Ethion             | 11.072   | 231.00>128.90                    | 27 | 231.00>174.90 | 12 |
| Etridiazole        | 6.318    | 211.00>182.90                    | 12 | 183.00>139.90 | 15 |
| Fenclozim          | 7.548    | 224.00>189.00                    | 15 | 189.00>104.10 | 15 |
| Fenitrothion       | 8.863    | 277.00>260.00                    | 6  | 260.00>125.00 | 15 |
| Fenothiocarb       | 10.071   | 160.00>72.10                     | 15 | 160.00>55.10  | 18 |
| Fenoxanil          | 10.822   | 189.00>125.00                    | 15 | 293.00>155.10 | 24 |
| Fenpropathrin      | 12.621   | 265.00>210.10                    | 15 | 181.00>127.10 | 27 |
| Fenthion           | 9.108    | 278.00>109.00                    | 21 | 278.00>169.00 | 18 |
| Fenvalerate-1      | 15.792   | 167.00>125.10                    | 9  | 225.00>119.10 | 18 |
| Fenvalerate-2      | 15.992   | 167.00>125.10                    | 9  | 225.00>119.10 | 18 |
| Fipronil           | 9.597    | 367.00>213.00                    | 30 | 369.00>214.90 | 30 |
| Flucythrinate-1    | 15.103   | 199.00>107.10                    | 27 | 225.00>147.10 | 12 |
| Flucythrinate-2    | 15.445   | 199.00>107.10                    | 27 | 225.00>147.10 | 12 |
| Flumioxazin        | 15.797   | 354.00>176.10                    | 24 | 354.00>108.10 | 21 |
| Fluopyram          | 9.641    | 173.00>145.10                    | 18 | 223.00>196.00 | 18 |
| Fonofos            | 7.945    | 246.00>137.00                    | 6  | 246.00>109.00 | 18 |
| Fthalide           | 9.384    | 243.00>214.80                    | 21 | 272.00>242.90 | 12 |
| Halfenprox         | 14.988   | 265.00>117.10                    | 15 | 265.00>115.10 | 24 |
| Heptachlor         | 8.695    | 272.00>236.80                    | 18 | 272.00>234.80 | 18 |
| Heptachlor epoxide | 9.655    | 353.00>262.80                    | 18 | 353.00>281.90 | 15 |
| Imibenconazole     | 17.434   | 375.00>260.00                    | 21 | 375.00>305.90 | 12 |
| Indanofan          | 12.73    | 310.00>139.10                    | 6  | 310.00>171.10 | 12 |
| Indoxacarb         | 16.387   | 218.00>203.00                    | 12 | 264.00>176.10 | 15 |
| Iprodione          | 12.37    | 314.00>244.90                    | 15 | 316.00>56.10  | 21 |
| Isazofos           | 8.062    | 257.00>162.10                    | 9  | 257.00>119.00 | 21 |
| Isofenphos         | 9.59     | 213.00>121.10                    | 15 | 185.00>121.10 | 15 |
| Mecarbam           | 9.639    | 329.00>131.10                    | 18 | 296.00>196.10 | 9  |
| Methidathion       | 9.935    | 145.00>85.00                     | 9  | 145.00>58.00  | 15 |
| Metolachlor        | 9.04     | 238.00>162.20                    | 15 | 238.00>133.10 | 27 |
| Metribuzin         | 8.507    | 198.00>82.10                     | 18 | 198.00>110.10 | 12 |
| Oxyfluorfen        | 10.53    | 252.00>146.10                    | 30 | 252.00>170.10 | 30 |
| Parathion          | 9.159    | 291.00>109.00                    | 15 | 291.00>81.00  | 27 |
| Parathion-methyl   | 8.573    | 263.00>109.00                    | 15 | 263.00>246.00 | 6  |
| Pendimethalin      | 9.493    | 252.00>162.10                    | 12 | 252.00>191.10 | 9  |
| Penthiopyrad       | 11.04    | 302.00>177.10                    | 21 | 177.00>101.00 | 15 |
| Permethrin-1       | 14.103   | 183.00>153.10                    | 15 | 183.00>165.10 | 12 |
| Permethrin-2       | 14.229   | 183.00>153.10                    | 15 | 183.00>165.10 | 12 |
| Phenothrin         | 12.963   | 123.00>81.10                     | 9  | 123.00>79.10  | 18 |

|                    |        |               |    |               |    |
|--------------------|--------|---------------|----|---------------|----|
| Phorate            | 7.46   | 260.00>75.10  | 15 | 231.00>129.00 | 24 |
| Phosalone          | 13.068 | 182.00>75.10  | 30 | 182.00>102.10 | 18 |
| Picoxystrobin      | 10.088 | 335.00>173.10 | 12 | 303.00>157.10 | 24 |
| Piperonyl butoxide | 12.02  | 176.00>131.10 | 15 | 176.00>117.10 | 21 |
| Pirimiphos ethyl   | 9.296  | 318.00>166.20 | 15 | 333.00>180.10 | 9  |
| Pretilachlor       | 10.342 | 262.00>202.10 | 12 | 238.00>146.10 | 12 |
| Prochloraz         | 14.327 | 180.00>138.10 | 12 | 308.00>70.10  | 15 |
| Procymidone        | 9.785  | 283.00>96.10  | 12 | 285.00>96.10  | 12 |
| Promecarb          | 7.439  | 150.00>135.10 | 12 | 135.00>115.10 | 15 |
| Prometryn          | 8.689  | 241.00>58.10  | 15 | 226.00>184.10 | 9  |
| Propachlor         | 7.064  | 176.00>57.10  | 9  | 176.00>120.00 | 12 |
| Propazine          | 7.791  | 214.00>172.10 | 9  | 229.00>58.10  | 9  |
| Propiconazole-1    | 11.576 | 259.00>69.10  | 15 | 259.00>173.00 | 18 |
| Propiconazole-2    | 11.672 | 259.00>69.10  | 15 | 259.00>173.00 | 18 |
| Propisochlor       | 8.617  | 162.00>120.10 | 18 | 162.00>147.10 | 18 |
| Propyzamide        | 7.944  | 173.00>109.00 | 27 | 254.00>191.10 | 18 |
| Prothiofos         | 10.327 | 267.00>238.90 | 12 | 309.00>239.00 | 18 |
| Pyridalyl          | 15.286 | 204.00>148.10 | 21 | 204.00>146.10 | 27 |
| Quintozene         | 7.843  | 295.00>236.80 | 18 | 237.00>142.90 | 24 |
| Silafluofen        | 15.374 | 286.00>258.10 | 12 | 286.00>207.10 | 15 |
| Simazine           | 7.733  | 201.00>173.10 | 6  | 173.00>138.20 | 9  |
| Simeconazole       | 8.583  | 211.00>195.10 | 6  | 211.00>121.10 | 15 |
| Simetryn           | 8.632  | 213.00>185.10 | 9  | 213.00>170.10 | 9  |
| Spiromesifen       | 12.184 | 272.00>254.10 | 9  | 272.00>185.10 | 24 |
| Tebupirimfos       | 8.179  | 318.00>152.20 | 15 | 276.00>234.00 | 6  |
| Tefluthrin         | 8.047  | 177.00>127.00 | 18 | 197.00>141.10 | 15 |
| Terbufos           | 7.878  | 231.00>129.00 | 24 | 231.00>174.90 | 15 |
| Terbutryn          | 8.852  | 241.00>185.10 | 6  | 226.00>96.10  | 18 |
| Tetradifon         | 12.969 | 356.00>159.00 | 15 | 356.00>228.90 | 9  |
| Thiifluzamide      | 10.49  | 447.00>426.80 | 18 | 447.00>399.80 | 27 |
| Tolclofos-methyl   | 8.58   | 265.00>249.90 | 12 | 265.00>93.10  | 24 |
| Triadimenol        | 9.787  | 128.00>65.10  | 21 | 168.00>70.10  | 15 |
| Tri-allate         | 8.148  | 268.00>184.00 | 21 | 270.00>186.00 | 21 |
| Trifluralin        | 7.273  | 306.00>264.00 | 9  | 264.00>160.10 | 15 |
| Vinclozolin        | 8.531  | 212.00>172.00 | 15 | 285.00>212.10 | 15 |
| Zoxamide           | 12.192 | 258.00>187.00 | 12 | 187.00>123.00 | 24 |

Table S2. MRM conditions for 179 pesticides in the analysis of LC-MS/MS

| pesticide        | RT<br>(min) | Ionization                     | Precursor ion > Product ion (CE, eV) |   |        |     |               |   |        |     |
|------------------|-------------|--------------------------------|--------------------------------------|---|--------|-----|---------------|---|--------|-----|
|                  |             |                                | Quantifier ion                       |   |        |     | Qualifier ion |   |        |     |
| Demeton-S-methyl | 5.641       | M+H <sup>+</sup>               | 230.9                                | > | 89.1   | -9  | 230.9         | > | 61.2   | -30 |
| Diazinon         | 9.088       | M+H <sup>+</sup>               | 305.1                                | > | 169.1  | -20 | 305.1         | > | 153.1  | -20 |
| Dichlorvos(DDVP) | 5.411       | M+H <sup>+</sup>               | 221.0                                | > | 220.8  | -7  | 221.0         | > | 108.9  | -17 |
| Diethofencarb    | 6.965       | M+H <sup>+</sup>               | 268.2                                | > | 226.2  | -10 | 268.2         | > | 180.2  | -18 |
| Diflubenzuron    | 8.203       | M+H <sup>+</sup>               | 311                                  | > | 141.1  | -33 | 311           | > | 158.15 | -14 |
| Dimepiperate     | 10.046      | M+H <sup>+</sup>               | 264.1                                | > | 146.15 | -11 | 264.1         | > | 119.1  | -19 |
| Dimethametryn    | 8.448       | M+H <sup>+</sup>               | 256.2                                | > | 185.85 | -24 | 256.2         | > | 96.25  | -30 |
| Dimethenamid     | 7.380       | M+H <sup>+</sup>               | 276.1                                | > | 244.15 | -13 | 276.1         | > | 168.1  | -23 |
| Dimethomorph(E)  | 7.140       | M+H <sup>+</sup>               | 388.1                                | > | 301.15 | -21 | 388.1         | > | 165.15 | -31 |
| Dimethomorph(Z)  | 7.470       | M+H <sup>+</sup>               | 388.1                                | > | 301.15 | -21 | 388.1         | > | 165.15 | -31 |
| Diniconazole     | 9.627       | M+H <sup>+</sup>               | 326                                  | > | 70.1   | -25 | 326           | > | 158.9  | -30 |
| Dinotefuran      | 4.141       | M+H <sup>+</sup>               | 203                                  | > | 129.1  | -13 | 203           | > | 114.1  | -14 |
| Diphenamid       | 6.635       | M+H <sup>+</sup>               | 240.1                                | > | 134.15 | -21 | 240.1         | > | 165.1  | -45 |
| Dithiopyr        | 9.922       | M+H <sup>+</sup>               | 402                                  | > | 354.15 | -18 | 402           | > | 272.1  | -29 |
| Diuron           | 6.387       | M+H <sup>+</sup>               | 233                                  | > | 72.1   | -23 | 233           | > | 160    | -26 |
| Edifenphos       | 8.974       | M+H <sup>+</sup>               | 311                                  | > | 109.05 | -30 | 311           | > | 111.1  | -22 |
| Esprocarb        | 10.670      | M+H <sup>+</sup>               | 266.2                                | > | 91.2   | -22 | 266.2         | > | 65.2   | -55 |
| Ethaboxam        | 5.844       | M+H <sup>+</sup>               | 321.1                                | > | 183.1  | -23 | 321.1         | > | 200.1  | -25 |
| Ethiofencarb     | 5.900       | M+H <sup>+</sup>               | 226                                  | > | 107.1  | -16 | 226           | > | 164.1  | -9  |
| Ethoprophos      | 8.311       | M+H <sup>+</sup>               | 243.1                                | > | 97     | -30 | 243.1         | > | 131.05 | -19 |
| Ethoxysulfuron   | 7.499       | M+H <sup>+</sup>               | 399                                  | > | 261.15 | -16 | 399           | > | 218.1  | -25 |
| Etofenprox       | 13.391      | M+NH <sub>4</sub> <sup>+</sup> | 394.1                                | > | 177.1  | -17 | 394.1         | > | 134.9  | -25 |
| Etioazole        | 11.545      | M+H <sup>+</sup>               | 360                                  | > | 140.9  | -29 | 360           | > | -63    | -55 |
| Etrimfos         | 8.892       | M+H <sup>+</sup>               | 293                                  | > | 265.05 | -17 | 293           | > | 125.1  | -25 |
| Famoxadone       | 8.946       | M+NH <sub>4</sub> <sup>+</sup> | 392.4                                | > | 330.95 | -12 | 392.4         | > | 195.2  | -30 |
| Fenamiphos       | 8.449       | M+H <sup>+</sup>               | 304                                  | > | 217.1  | -23 | 304           | > | 202.05 | -35 |
| Fenarimol        | 8.192       | M+H <sup>+</sup>               | 331                                  | > | 268.15 | -22 | 331           | > | 81.2   | -29 |
| Fenazaquin       | 12.891      | M+H <sup>+</sup>               | 307.1                                | > | 161.25 | -16 | 307.1         | > | 147.15 | -18 |
| Fenbuconazole    | 8.213       | M+H <sup>+</sup>               | 337                                  | > | 125.1  | -32 | 337           | > | 70.2   | -18 |
| Fenhexamid       | 7.951       | M+H <sup>+</sup>               | 301.9                                | > | 55.1   | -41 | 301.9         | > | 97.1   | -24 |
| Fenobucarb       | 6.970       | M+H <sup>+</sup>               | 208                                  | > | 95.1   | -14 | 208           | > | 151.9  | -10 |
| Fenoxaprop-ethyl | 10.293      | M+H <sup>+</sup>               | 361.9                                | > | 287.9  | -19 | 361.9         | > | 120.9  | -27 |
| Fenoxycarb       | 8.439       | M+H <sup>+</sup>               | 302                                  | > | 115.9  | -12 | 302           | > | 255.9  | -13 |
| Fenpyroximate    | 11.984      | M+H <sup>+</sup>               | 422                                  | > | 365.9  | -16 | 422           | > | 134.9  | -32 |
| Fentrazamide     | 8.974       | M+H <sup>+</sup>               | 350.1                                | > | 83.2   | -23 | 350.1         | > | 154.2  | -11 |
| Ferimzone(E)     | 6.638       | M+H <sup>+</sup>               | 255.1                                | > | 132.2  | -21 | 255.1         | > | 124.2  | -22 |
| Ferimzone(Z)     | 7.125       | M+H <sup>+</sup>               | 255.1                                | > | 132.2  | -21 | 255.1         | > | 124.2  | -22 |
| Flonicamid       | 4.329       | M+H <sup>+</sup>               | 230                                  | > | 203.05 | -15 | 230           | > | 148.1  | -27 |
| Fluacrypyrim     | 9.706       | M+H <sup>+</sup>               | 427.1                                | > | 145.1  | -22 | 427.1         | > | 205.1  | -10 |
| Flubendiamide    | 8.442       | M+H <sup>+</sup>               | 682.8                                | > | 407.9  | -12 | 682.8         | > | 255.9  | -55 |
|                  |             | (M-H) <sup>-</sup>             | 680.9                                | > | 254.05 | 27  | 680.9         | > | 274    | 17  |
| Flucetosulfuron  | 6.699       | M+H <sup>+</sup>               | 488                                  | > | 156.15 | -21 | 488           | > | 273.1  | -26 |
| Fludioxonil      | 7.093       | M+NH <sub>4</sub> <sup>+</sup> | 265.9                                | > | 228.9  | -15 | 265.9         | > | 157.9  | -32 |
| Flufenacet       | 7.935       | M+H <sup>+</sup>               | 364.1                                | > | 152.1  | -18 | 364.1         | > | 194.15 | -11 |
| Flufenoxuron     | 11.253      | M+H <sup>+</sup>               | 489                                  | > | 158.1  | -22 | 489           | > | 141.1  | -47 |
| Fluopicolide     | 7.456       | M+H <sup>+</sup>               | 382.8                                | > | 173    | -22 | 382.8         | > | 109.05 | -55 |
| Fluquinconazole  | 7.858       | M+H <sup>+</sup>               | 375.9                                | > | 307    | -27 | 375.9         | > | 108.15 | -50 |
| Flusilazole      | 8.409       | M+H <sup>+</sup>               | 316.1                                | > | 247.1  | -18 | 316.1         | > | 165.1  | -27 |
| Flutolanil       | 7.260       | M+H <sup>+</sup>               | 324                                  | > | 242.1  | -24 | 324           | > | 262.1  | -17 |
| Fluxapyroxad     | 7.276       | M+H <sup>+</sup>               | 382                                  | > | 362.1  | -15 | 382           | > | 342.1  | -23 |
| Forchlorfenuron  | 6.294       | M+H <sup>+</sup>               | 288.1                                | > | 129.05 | -15 | 288.1         | > | 155    | -14 |
| Fosthiazate      | 5.946       | M+H <sup>+</sup>               | 284.1                                | > | 104.15 | -20 | 284.1         | > | 228    | -10 |
| Furathiocarb     | 10.604      | M+H <sup>+</sup>               | 383.2                                | > | 195.1  | -19 | 383.2         | > | 252.15 | -13 |

|                     |            |                                    |       |   |        |     |       |   |        |     |
|---------------------|------------|------------------------------------|-------|---|--------|-----|-------|---|--------|-----|
| Gibberellic acid    | -<br>4.532 | M+NH <sub>4</sub> <sup>+</sup>     | 364.2 | > | 364.2  | -7  | 364.2 | > | 239.05 | -17 |
|                     |            | M-H <sup>+</sup>                   | 345.0 | > | 345.2  | 8   | 345.0 | > | 143.3  | 30  |
| Halosulfuron-methyl | 7.769      | M+H <sup>+</sup>                   | 434.9 | > | 182.05 | -23 | 434.9 | > | 139.15 | -43 |
| Haloxypop           | 8.571      | M+H <sup>+</sup>                   | 362.1 | > | 316.1  | -30 | 362.1 | > | 91.25  | -14 |
| Hexaconazole        | 9.235      | M+H <sup>+</sup>                   | 314   | > | 70.15  | -23 | 314   | > | 159    | -31 |
| Hexaflumuron        | 9.751      | (M-H) <sup>-</sup>                 | 458.7 | > | 438.95 | 13  | 458.7 | > | 174.75 | 34  |
| Hexazinone          | 5.661      | M+H <sup>+</sup>                   | 253   | > | 170.8  | -18 | 253   | > | 71.2   | -32 |
| Hexythiazox         | 11.104     | M+H <sup>+</sup>                   | 353.1 | > | 227.9  | -15 | 353.1 | > | 168.15 | -24 |
| Imazalil            | 6.086      | M+H <sup>+</sup>                   | 296.9 | > | 159.1  | -24 | 296.9 | > | 69.15  | -19 |
| Imazosulfuron       | 7.240      | M+H <sup>+</sup>                   | 412.9 | > | 153.15 | -13 | 412.9 | > | 156.1  | -22 |
| Imicyafos           | 5.169      | M+H <sup>+</sup>                   | 305.1 | > | 201.15 | -22 | 305.1 | > | 235.05 | -17 |
| Imidacloprid        | 4.488      | M+H <sup>+</sup>                   | 256   | > | 209.15 | -18 | 256   | > | 175.2  | -10 |
| Inabenfide          | 7.056      | M+H <sup>+</sup>                   | 339.1 | > | 321.1  | -20 | 339.1 | > | 80.2   | -30 |
| Iprobenfos          | 8.775      | M+H <sup>+</sup>                   | 289   | > | 91.2   | -30 | 289   | > | 205.05 | -10 |
| Iprovalicarb        | 7.905      | M+H <sup>+</sup>                   | 321.2 | > | 119.15 | -21 | 321.2 | > | 203.2  | -9  |
| Isoprocarb          | 6.201      | M+H <sup>+</sup>                   | 194.1 | > | 95.15  | -16 | 194.1 | > | 137.2  | -11 |
| Isoprothiolane      | 7.474      | M+H <sup>+</sup>                   | 290.9 | > | 189.1  | -21 | 290.9 | > | 231.1  | -11 |
| Isopyrazam          | 9.747      | M+H <sup>+</sup>                   | 360   | > | 244.15 | -23 | 360   | > | 320.2  | -21 |
| Kresoxim-methyl     | 8.693      | M+H <sup>+</sup>                   | 314   | > | 115.9  | -23 | 314   | > | 131.1  | -25 |
| Linuron             | 6.979      | M+H <sup>+</sup>                   | 249   | > | 160    | -17 | 249   | > | 182.15 | -16 |
| Lufenuron           | 10.696     | M+H <sup>+</sup>                   | 510.7 | > | 158    | -22 | 510.7 | > | 140.9  | -44 |
| Malathion           | 7.370      | M+H <sup>+</sup>                   | 330.9 | > | 126.8  | -12 | 330.9 | > | -99    | -23 |
| Mandipropamid       | 7.137      | M+H <sup>+</sup>                   | 411.9 | > | 328.25 | -15 | 411.9 | > | 125.1  | -35 |
| Mefenacet           | 7.805      | M+H <sup>+</sup>                   | 299   | > | 148.2  | -13 | 299   | > | 120.15 | -24 |
| Mepanipyrim         | 7.940      | M+H <sup>+</sup>                   | 224.1 | > | 77.2   | -38 | 224.1 | > | 106.2  | -25 |
| Mepronil            | 7.502      | M+H <sup>+</sup>                   | 270.1 | > | 91.2   | -42 | 270.1 | > | 119.1  | -24 |
| Metalaxyl           | 6.459      | M+H <sup>+</sup>                   | 280.1 | > | 220.2  | -14 | 280.1 | > | 160.1  | -23 |
| Metamifop           | 10.429     | M+H <sup>+</sup>                   | 441   | > | 288.1  | -20 | 441   | > | 180.2  | -21 |
| Metazosulfuron      | 6.896      | M+H <sup>+</sup>                   | 475.9 | > | 182.15 | -20 | 475.9 | > | 295.1  | -17 |
| Metconazole         | 9.269      | M+H <sup>+</sup>                   | 320.1 | > | 70.1   | -23 | 320.1 | > | 125.15 | -39 |
| Methabenzthiazuron  | 6.349      | M+H <sup>+</sup>                   | 222.1 | > | 165.15 | -16 | 222.1 | > | 150.1  | -32 |
| Methiocarb          | 7.147      | M+H <sup>+</sup>                   | 226.1 | > | 121.1  | -17 | 226.1 | > | 169.2  | -10 |
| Methomyl            | 4.341      | M+H <sup>+</sup>                   | 162.9 | > | 88.15  | -10 | 162.9 | > | 106.15 | -11 |
| Methoxyfenozide     | 7.545      | M+H <sup>+</sup>                   | 369.2 | > | 149.1  | -18 | 369.2 | > | 133.2  | -23 |
| Metobromuron        | 6.125      | M+H <sup>+</sup>                   | 258.9 | > | 169.7  | -19 | 258.9 | > | 148.1  | -16 |
| Metolcarb           | 5.271      | M+H <sup>+</sup>                   | 166.2 | > | 109.15 | -12 | 166.2 | > | 94.2   | -30 |
| Metrafenone         | 9.443      | M+H <sup>+</sup>                   | 408.9 | > | 209.15 | -15 | 408.9 | > | 227.05 | -21 |
| Mevinphos           | 4.636      | M+H <sup>+</sup>                   | 225   | > | 127.15 | -16 | 225   | > | 193.1  | -9  |
| MilbemectinA3       | 12.770     | M+H <sup>+</sup> -H <sub>2</sub> O | 511.1 | > | 95     | -31 | 511.1 | > | 105    | -54 |
| MilbemectinA4       | 13.514     | M+H <sup>+</sup> -H <sub>2</sub> O | 525.1 | > | 55.1   | -54 | 525.1 | > | 91.1   | -54 |
| Molinate            | 7.950      | M+H <sup>+</sup>                   | 188.1 | > | 55.15  | -24 | 188.1 | > | 126.2  | -14 |
| Monocrotophos       | 4.636      | M+H <sup>+</sup>                   | 224.2 | > | 127.15 | -15 | 224.2 | > | 109.15 | -29 |
| Myclobutanil        | 7.576      | M+H <sup>+</sup>                   | 289.1 | > | 70.1   | -18 | 289.1 | > | 125.15 | -31 |
| Napropamide         | 8.232      | M+H <sup>+</sup>                   | 272.1 | > | 171.15 | -18 | 272.1 | > | 129.25 | -15 |
| Nicosulfuron        | 5.268      | M+H <sup>+</sup>                   | 411   | > | 182.15 | -21 | 411   | > | 106.15 | -33 |
| Novaluron           | 9.896      | M+H <sup>+</sup>                   | 492.8 | > | 158    | -22 | 492.8 | > | 141.1  | -43 |
| Nuarimol            | 7.179      | M+H <sup>+</sup>                   | 315   | > | 252.1  | -23 | 315   | > | 81.2   | -28 |
| Ofurace             | 5.491      | M+H <sup>+</sup>                   | 282   | > | 254.2  | -12 | 282   | > | 160.15 | -23 |
| Omethoate           | 4.085      | M+H <sup>+</sup>                   | 213.9 | > | 125    | -21 | 213.9 | > | 109.05 | -25 |
| Oxadiazon           | 10.791     | M+H <sup>+</sup>                   | 344.9 | > | 177.05 | -28 | 344.9 | > | 303.05 | -14 |
| Oxadixyl            | 5.106      | M+H <sup>+</sup>                   | 279.1 | > | 219.2  | -11 | 279.1 | > | 133.2  | -21 |
| Oxamyl              | 4.217      | M+H <sup>+</sup>                   | 237.2 | > | 72.2   | -23 | 237.2 | > | 90.15  | -8  |

|                           |        |                  |       |   |        |     |       |   |        |     |
|---------------------------|--------|------------------|-------|---|--------|-----|-------|---|--------|-----|
| Oxaziclomefon             | 10.381 | M+H <sup>+</sup> | 376   | > | 190.15 | -15 | 376   | > | 133.1  | -34 |
| Paclobutrazole            | 7.366  | M+H <sup>+</sup> | 294.1 | > | 70.1   | -25 | 294.1 | > | 125.15 | -37 |
| Penconazole               | 8.896  | M+H <sup>+</sup> | 284   | > | 70     | -16 | 284   | > | 159.1  | -29 |
| Pencycuron                | 9.564  | M+H <sup>+</sup> | 329.1 | > | 125.1  | -25 | 329.1 | > | 99.05  | -55 |
| Penoxsulam                | 5.540  | M+H <sup>+</sup> | 484   | > | 195.15 | -28 | 484   | > | 164.1  | -35 |
| Pentoxazone               | 10.304 | M+H <sup>+</sup> | 284.0 | > | 70.0   | -16 | 284.0 | > | 159.1  | -32 |
| Phenthoate                | 8.515  | M+H <sup>+</sup> | 321   | > | 79.2   | -38 | 321   | > | 135.1  | -21 |
| Phosphamidone             | 5.217  | M+H <sup>+</sup> | 300   | > | 174.2  | -13 | 300   | > | 127.15 | -22 |
| Phoxim                    | 9.152  | M+H <sup>+</sup> | 299   | > | 77.1   | -29 | 299   | > | 129.2  | -11 |
| Piperophos                | 9.940  | M+H <sup>+</sup> | 354.1 | > | 171    | -22 | 354.1 | > | 255.1  | -14 |
| Pirimicarb                | 5.773  | M+H <sup>+</sup> | 239.1 | > | 72.2   | -23 | 239.1 | > | 182.15 | -16 |
| Pirimiphos-methyl         | 9.350  | M+H <sup>+</sup> | 306.1 | > | 108.2  | -30 | 306.1 | > | 164.25 | -22 |
| Probenazole               | 5.196  | M+H <sup>+</sup> | 224   | > | 41.2   | -12 | 224   | > | 39.2   | -30 |
| Profenofos                | 10.422 | M+H <sup>+</sup> | 372.9 | > | 302.9  | -19 | 372.9 | > | 128.1  | -42 |
| Propamocarb               | 4.126  | M+H <sup>+</sup> | 189.3 | > | 102.15 | -17 | 189.3 | > | 74.2   | -26 |
| Propanil                  | 7.053  | M+H <sup>+</sup> | 217.8 | > | 127.1  | -24 | 217.8 | > | 162.1  | -16 |
| Propaquizafop             | 10.697 | M+H <sup>+</sup> | 444.1 | > | 100.15 | -18 | 444.1 | > | 56.15  | -29 |
| Propoxur                  | 5.478  | M+H <sup>+</sup> | 210.1 | > | 111.15 | -14 | 210.1 | > | 93.1   | -23 |
| Pyraclofos                | 9.346  | M+H <sup>+</sup> | 360.9 | > | 137.9  | -38 | 360.9 | > | 110.9  | -55 |
| Pyraclostrobin            | 9.233  | M+H <sup>+</sup> | 388   | > | 163.2  | -24 | 388   | > | 194.2  | -12 |
| Pyrazolate                | 9.494  | M+H <sup>+</sup> | 438.9 | > | 91.2   | -35 | 438.9 | > | 172.95 | -20 |
| Pyrazophos                | 9.469  | M+H <sup>+</sup> | 374   | > | 222.1  | -21 | 374   | > | 194.1  | -32 |
| Pyribenzoxim              | 10.726 | M+H <sup>+</sup> | 610.1 | > | 413.1  | -14 | 610.1 | > | 180.2  | -26 |
| Pyributicarb              | 10.951 | M+H <sup>+</sup> | 331.1 | > | 181.1  | -16 | 331.1 | > | 108.2  | -29 |
| Pyridaben                 | 12.479 | M+H <sup>+</sup> | 365.1 | > | 147.25 | -24 | 365.1 | > | 309.15 | -14 |
| Pyridaphenthion           | 7.692  | M+H <sup>+</sup> | 340.9 | > | 189    | -22 | 340.9 | > | 204.9  | -22 |
| Pyrifluquinazon           | 7.734  | M+H <sup>+</sup> | 465.1 | > | 423.2  | -21 | 465.1 | > | 107.2  | -31 |
| Pyriftalid                | 6.849  | M+H <sup>+</sup> | 318.9 | > | 139    | -31 | 318.9 | > | 83     | -44 |
| Pyrimethanil              | 7.084  | M+H <sup>+</sup> | 200.1 | > | 107.15 | -24 | 200.1 | > | 82.2   | -25 |
| Pyrimidifen               | 11.105 | M+H <sup>+</sup> | 378.1 | > | 184.1  | -24 | 378.1 | > | 150.2  | -35 |
| Pyriminobac<br>-methyl(E) | 6.810  | M+H <sup>+</sup> | 362.1 | > | 330.15 | -15 | 362.1 | > | 284.1  | -30 |
| Pyriminobac<br>-methyl(Z) | 7.343  | M+H <sup>+</sup> | 361.9 | > | 329.9  | -14 | 361.9 | > | -74.9  | -55 |
| Pyrimisulfan              | 6.337  | M+H <sup>+</sup> | 420.1 | > | 370.1  | -19 | 420.1 | > | 388.15 | -13 |
| Pyriproxyfen              | 10.875 | M+H <sup>+</sup> | 322.1 | > | 96.1   | -14 | 322.1 | > | 185.1  | -23 |
| Pyroquilon                | 5.764  | M+H <sup>+</sup> | 174.1 | > | 117.15 | -32 | 174.1 | > | 132.15 | -22 |
| Quinalphos                | 8.682  | M+H <sup>+</sup> | 298.9 | > | 96.9   | -33 | 298.9 | > | 162.9  | -21 |
| Quinmerac                 | 4.818  | M+H <sup>+</sup> | 222   | > | 204.05 | -15 | 222   | > | 141.1  | -31 |
| Quinoclamine              | 5.365  | M+H <sup>+</sup> | 207.9 | > | 104.9  | -24 | 207.9 | > | 77.1   | -36 |
| Quizalofop-ethyl          | 10.396 | M+H <sup>+</sup> | 372.9 | > | 299    | -18 | 372.9 | > | 162.9  | -38 |
| Saflufenacil              | 6.630  | M+H <sup>+</sup> | 501   | > | 198    | -44 | 501   | > | 349    | -28 |
| Sethoxydim                | 10.697 | M+H <sup>+</sup> | 328.1 | > | 178.15 | -20 | 328.1 | > | 282.15 | -11 |
| Spinetoram(J)             | 10.465 | M+H <sup>+</sup> | 748.3 | > | 142.25 | -29 | 748.3 | > | 98.2   | -55 |
| Spinetoram(L)             | 11.013 | M+H <sup>+</sup> | 760.3 | > | 142.15 | -30 | 760.3 | > | 98.2   | -55 |
| Spirodiclofen             | 11.948 | M+H <sup>+</sup> | 411.1 | > | 313.05 | -14 | 411.1 | > | 71.05  | -22 |
| Spirotetramat             | 8.039  | M+H <sup>+</sup> | 374   | > | 216    | -34 | 374   | > | 302.1  | -17 |
| Spirotetramat-enol        | 5.945  | M+H <sup>+</sup> | 302.2 | > | 216.1  | 0   | 302.2 | > | 270.2  | 0   |
| Sulfoxaflor               | 4.664  | M+H <sup>+</sup> | 278   | > | 174.15 | -10 | 278   | > | 154.05 | -26 |
| Tebuconazole              | 8.856  | M+H <sup>+</sup> | 308.1 | > | 70.15  | -24 | 308.1 | > | 125.15 | -36 |
| Tebufenozide              | 8.548  | M+H <sup>+</sup> | 353.2 | > | 133.2  | -21 | 353.2 | > | 105.15 | -40 |
| Tebufenpyrad              | 10.679 | M+H <sup>+</sup> | 334.1 | > | 117.1  | -36 | 334.1 | > | 145.1  | -27 |
| Teflubenzuron             | 10.554 | M+H <sup>+</sup> | 380.9 | > | 158.1  | -17 | 380.9 | > | 141.15 | -34 |
| Terbuthylazine            | 7.351  | M+H <sup>+</sup> | 230.1 | > | 174.15 | -16 | 230.1 | > | 104.05 | -16 |
| Tetraconazole             | 7.899  | M+H <sup>+</sup> | 372   | > | 159.05 | -30 | 372   | > | 70.1   | -30 |

|                           |                |                                   |       |   |        |     |       |   |        |     |
|---------------------------|----------------|-----------------------------------|-------|---|--------|-----|-------|---|--------|-----|
| Thenylchlor               | 8.153          | M+H <sup>+</sup>                  | 324   | > | 127.15 | -12 | 324   | > | 97.1   | -12 |
| Thiabendazole             | 4.711          | M+H <sup>+</sup>                  | 201.9 | > | 175.1  | -24 | 201.9 | > | 131.15 | -24 |
| Thiacloprid               | 4.780          | M+H <sup>+</sup>                  | 252.9 | > | 126    | -23 | 252.9 | > | 185.9  | -23 |
| Thiamethoxam              | 4.331          | M+H <sup>+</sup>                  | 292   | > | 211.1  | -12 | 292   | > | 181.05 | -12 |
| Thiazopyr                 | 8.703          | M+H <sup>+</sup>                  | 397   | > | 377.2  | -23 | 397   | > | 335.15 | -23 |
| Thidiazuron               | 5.404          | M+H <sup>+</sup>                  | 221   | > | 102.05 | -14 | 221   | > | 128.1  | -14 |
| Thifensulfuron<br>-methyl | 5.193          | M+H <sup>+</sup>                  | 387.9 | > | 167.15 | -16 | 387.9 | > | 205.05 | -16 |
| Thiobencarb               | 9.499          | M+H <sup>+</sup>                  | 258   | > | 125.15 | -22 | 258   | > | 89.1   | -22 |
| Thiodicarb                | 5.805          | M+H <sup>+</sup>                  | 355   | > | 88.1   | -22 | 355   | > | 108.05 | -22 |
| Tiadinil                  | 7.697<br>7.701 | MCl <sub>35</sub> +H <sup>+</sup> | 267.9 | > | 101.1  | -19 | 269.8 | > | 101    | -20 |
|                           |                | (M-H) <sup>-</sup>                | 265.9 | > | 70.85  | 21  | 265.9 | > | 237.9  | 12  |
| Triadimefon               | 7.681          | M+H <sup>+</sup>                  | 294.1 | > | 197.15 | -15 | 294.1 | > | 225.15 | -12 |
| Triazophos                | 7.679          | M+H <sup>+</sup>                  | 314   | > | 162.1  | -19 | 314   | > | 119.1  | -33 |
| Tricyclazole              | 5.163          | M+H <sup>+</sup>                  | 190   | > | 163.1  | -23 | 190   | > | 136.1  | -26 |
| Trifloxystrobin           | 9.814          | M+H <sup>+</sup>                  | 409.1 | > | 186.05 | -21 | 409.1 | > | 206.2  | -15 |
| Triflumizole              | 10.083         | M+H <sup>+</sup>                  | 346.1 | > | 278.1  | -10 | 346.1 | > | 73.1   | -16 |
| Triflumuron               | 9.107          | M+H <sup>+</sup>                  | 359   | > | 156.05 | -15 | 359   | > | 139.05 | -29 |
| Uniconazole               | 8.364          | M+H <sup>+</sup>                  | 292.1 | > | 70.1   | -25 | 292.1 | > | 125.15 | -31 |
| Vamidothion               | 4.592          | M+H <sup>+</sup>                  | 288   | > | 146.15 | -12 | 288   | > | 118.15 | -22 |

Table S3. LOD, LOQ and linearity of the second 83 pesticides using GC-MS/MS.

| No | Pesticides                  | Limit detection of ( $\mu\text{g kg}^{-1}$ ) | Limit quantification of ( $\mu\text{g kg}^{-1}$ ) | Linearity ( $r^2$ ) |
|----|-----------------------------|----------------------------------------------|---------------------------------------------------|---------------------|
| 41 | Difenoconazole              | 3                                            | 10                                                | 0.9984              |
| 42 | Dimethoate                  | 3                                            | 10                                                | 0.9952              |
| 43 | Dimethylvinphos(E)          | 3                                            | 10                                                | 0.9999              |
| 44 | Dimethylvinphos(Z)          | 3                                            | 10                                                | 0.9996              |
| 45 | Diphenylamine               | 3                                            | 10                                                | 0.9972              |
| 46 | Disulfoton                  | 3                                            | 10                                                | 0.9988              |
| 47 | Endosulfan sulfate          | 3                                            | 10                                                | 0.9994              |
| 48 | Endosulfan-alpha            | 3                                            | 10                                                | 0.9973              |
| 49 | Endosulfan-beta             | 3                                            | 10                                                | 0.9999              |
| 50 | Endrin                      | 3                                            | 10                                                | 0.9997              |
| 51 | EPN                         | 3                                            | 10                                                | 0.9994              |
| 52 | Epoxiconazole               | 3                                            | 10                                                | 0.9999              |
| 53 | Ethalfuralin                | 3                                            | 10                                                | 0.9966              |
| 54 | Ethion                      | 3                                            | 10                                                | 0.9997              |
| 55 | Etridiazole                 | 3                                            | 10                                                | 0.9982              |
| 56 | Fenclorim                   | 3                                            | 10                                                | 0.9981              |
| 57 | Fenitrothion                | 3                                            | 10                                                | 0.9998              |
| 58 | Fenothiocarb                | 3                                            | 10                                                | 0.9999              |
| 59 | Fenoxanil                   | 3                                            | 10                                                | 0.9998              |
| 60 | Fenpropathrin               | 3                                            | 10                                                | 0.9998              |
| 61 | Fenthion                    | 3                                            | 10                                                | 0.9999              |
| 62 | Fenvalerate                 | 3                                            | 10                                                | 0.9996              |
| 63 | Fipronil                    | 3                                            | 10                                                | 0.9996              |
| 64 | Flucythrinate               | 3                                            | 10                                                | 0.9993              |
| 65 | Flumioxazine                | 3                                            | 10                                                | 0.9958              |
| 66 | Fluopyram                   | 3                                            | 10                                                | 0.9998              |
| 67 | Fonofos                     | 3                                            | 10                                                | 0.9987              |
| 68 | Fthalide                    | 3                                            | 10                                                | 0.9998              |
| 69 | Halfenprox                  | 3                                            | 10                                                | 0.9986              |
| 70 | Heptachlor                  | 3                                            | 10                                                | 0.9988              |
| 71 | Heptachlor-exo-epoxide      | 3                                            | 10                                                | 0.9993              |
| 72 | Imibenconazole              | 3                                            | 10                                                | 0.9985              |
| 73 | Indanofan                   | 3                                            | 10                                                | 0.9995              |
| 74 | Indoxacarb                  | 3                                            | 10                                                | 0.9999              |
| 75 | Iprodione                   | 3                                            | 10                                                | 0.9987              |
| 76 | Isazofos                    | 3                                            | 10                                                | 0.9996              |
| 77 | Isofenphos                  | 3                                            | 10                                                | 0.9993              |
| 78 | Mecarbam                    | 3                                            | 10                                                | 0.9995              |
| 79 | Methidathion                | 3                                            | 10                                                | 0.9999              |
| 80 | Metolachlor (S-Metolachlor) | 3                                            | 10                                                | 0.9995              |
| 81 | Metribuzin                  | 3                                            | 10                                                | 0.9999              |
| 82 | Oxyfluorfen                 | 3                                            | 10                                                | 0.9995              |
| 83 | Parathion-ethyl             | 3                                            | 10                                                | 0.9995              |
| 84 | Parathion-methyl            | 3                                            | 10                                                | 0.9998              |
| 85 | Pendimethalin               | 3                                            | 10                                                | 0.9998              |
| 86 | Penthiopyrad                | 3                                            | 10                                                | 0.9997              |
| 87 | Permethrin                  | 3                                            | 10                                                | 0.9999              |
| 88 | Phenothrin                  | 3                                            | 10                                                | 0.9998              |
| 89 | Phorate                     | 3                                            | 10                                                | 0.9977              |
| 90 | Phosalone                   | 3                                            | 10                                                | 0.9999              |

|     |                    |   |    |        |
|-----|--------------------|---|----|--------|
| 91  | Picoxystrobin      | 3 | 10 | 0.9999 |
| 92  | Piperonyl bitoxide | 3 | 10 | 0.9997 |
| 93  | Pirimiphos-ethyl   | 3 | 10 | 0.9997 |
| 94  | Pretilachlor       | 3 | 10 | 0.9996 |
| 95  | Prochloraz         | 3 | 10 | 0.9989 |
| 96  | Procymidone        | 3 | 10 | 0.9999 |
| 97  | Promecarb          | 3 | 10 | 0.9994 |
| 98  | Prometryn          | 3 | 10 | 0.9997 |
| 99  | Propachlor         | 3 | 10 | 0.9985 |
| 100 | Propazine          | 3 | 10 | 0.9998 |
| 101 | Propiconazole      | 3 | 10 | 0.9993 |
| 102 | Propisochlor       | 3 | 10 | 0.9994 |
| 103 | Propyzamide        | 3 | 10 | 0.9996 |
| 104 | Prothiofos         | 3 | 10 | 0.9999 |
| 105 | Pyridalyl          | 3 | 10 | 0.9999 |
| 106 | Quintozene         | 3 | 10 | 0.9996 |
| 107 | Silafluofen        | 3 | 10 | 0.9996 |
| 108 | Simazine           | 3 | 10 | 0.9977 |
| 109 | Simeconazole       | 3 | 10 | 0.9999 |
| 110 | Simetryn           | 3 | 10 | 0.9991 |
| 111 | Spiromesifen       | 3 | 10 | 0.9999 |
| 112 | Tebupirimfos       | 3 | 10 | 0.9975 |
| 113 | Tefluthrin         | 3 | 10 | 0.9988 |
| 114 | Terbufos           | 3 | 10 | 0.9991 |
| 115 | Terbutryn          | 3 | 10 | 0.9998 |
| 116 | Tetradifon         | 3 | 10 | 0.9998 |
| 117 | Thifluzamide       | 3 | 10 | 0.9998 |
| 118 | Tolclofos-methyl   | 3 | 10 | 0.9988 |
| 119 | Triadimenol        | 3 | 10 | 0.9999 |
| 120 | Tri-allate         | 3 | 10 | 0.9998 |
| 121 | Trifluralin        | 3 | 10 | 0.9992 |
| 122 | Vinclozolin        | 3 | 10 | 0.9999 |
| 123 | Zoxamide           | 3 | 10 | 0.9998 |



Table S4. LOD, LOQ, and linearity for the 179 tested pesticides using LC-MS/MS

| No | Pesticides       | Limit of detection ( $\mu\text{g kg}^{-1}$ ) | Limit of quantification ( $\mu\text{g kg}^{-1}$ ) | Linearity ( $r^2$ ) |
|----|------------------|----------------------------------------------|---------------------------------------------------|---------------------|
| 41 | Demeton-S-methyl | 3                                            | 10                                                | 0.9929              |
| 42 | Diazinon         | 3                                            | 10                                                | 0.9972              |
| 43 | Dichlorvos(DDVP) | 3                                            | 10                                                | 0.9978              |
| 44 | Diethofencarb    | 3                                            | 10                                                | 0.9990              |
| 45 | Diiflubenzuron   | 3                                            | 10                                                | 0.9961              |
| 46 | Dimepiperate     | 3                                            | 10                                                | 0.9978              |
| 47 | Dimethametryn    | 3                                            | 10                                                | 0.9933              |
| 48 | Dimethenamid     | 3                                            | 10                                                | 0.9920              |
| 49 | Dimethomorph(E)  | 3                                            | 10                                                | 0.9987              |
| 50 | Dimethomorph(Z)  | 3                                            | 10                                                | 0.9983              |
| 51 | Diniconazole     | 3                                            | 10                                                | 0.9992              |
| 52 | Dinotefuran      | 3                                            | 10                                                | 0.9958              |
| 53 | Diphenamid       | 3                                            | 10                                                | 0.9913              |
| 54 | Dithiopyr        | 3                                            | 10                                                | 0.9909              |
| 55 | Diuron           | 3                                            | 10                                                | 0.9908              |
| 56 | Edifenphos       | 3                                            | 10                                                | 0.9978              |
| 57 | Esprocarb        | 3                                            | 10                                                | 0.9915              |
| 58 | Ethaboxam        | 3                                            | 10                                                | 0.9969              |
| 59 | Ethiofencarb     | 3                                            | 10                                                | 0.9953              |
| 60 | Ethoprophos      | 3                                            | 10                                                | 0.9989              |
| 61 | Ethoxysulfuron   | 3                                            | 10                                                | 0.9984              |
| 62 | Etofenprox       | 3                                            | 10                                                | 0.9999              |
| 63 | Etoxazole        | 3                                            | 10                                                | 0.9979              |
| 64 | Etrimfos         | 3                                            | 10                                                | 0.9974              |
| 65 | Famoxadone       | 3                                            | 10                                                | 0.9993              |
| 66 | Fenamiphos       | 3                                            | 10                                                | 0.9925              |
| 67 | Fenarimol        | 3                                            | 10                                                | 0.9991              |
| 68 | Fenazaquin       | 3                                            | 10                                                | 0.9994              |
| 69 | Fenbuconazole    | 3                                            | 10                                                | 0.9965              |
| 70 | Fenhexamid       | 3                                            | 10                                                | 0.9978              |
| 71 | Fenobucarb       | 3                                            | 10                                                | 0.9977              |
| 72 | Fenoxaprop-ethyl | 3                                            | 10                                                | 0.9956              |
| 73 | Fenoxycarb       | 3                                            | 10                                                | 0.9994              |
| 74 | Fenpyroximate    | 3                                            | 10                                                | 0.9996              |
| 75 | Fentrazamide     | 3                                            | 10                                                | 0.9962              |
| 76 | Ferimzone(E)     | 3                                            | 10                                                | 0.9996              |
| 77 | Ferimzone(Z)     | 3                                            | 10                                                | 0.9993              |
| 78 | Flonicamid       | 3                                            | 10                                                | 0.9991              |
| 79 | Fluacrypyrim     | 3                                            | 10                                                | 0.9976              |
| 80 | Flubendiamide(-) | 3                                            | 10                                                | 0.9964              |
| 81 | Flubendiamide    | 3                                            | 10                                                | 0.9961              |
| 82 | Flucetosulfuron  | 3                                            | 10                                                | 0.9995              |
| 83 | Fludioxonil      | 3                                            | 10                                                | 0.9927              |
| 84 | Flufenacet       | 3                                            | 10                                                | 0.9913              |
| 85 | Flufenoxuron     | 3                                            | 10                                                | 0.9984              |
| 86 | Fluopicolide     | 3                                            | 10                                                | 0.9946              |
| 87 | Fluquinconazole  | 3                                            | 10                                                | 0.9970              |
| 88 | Flusilazole      | 3                                            | 10                                                | 0.9923              |
| 89 | Flutolanil       | 3                                            | 10                                                | 0.9974              |
| 90 | Fluxapyroxad     | 3                                            | 10                                                | 0.9965              |
| 91 | Forchlorfenuron  | 3                                            | 10                                                | 0.9998              |

|     |                                         |   |    |        |
|-----|-----------------------------------------|---|----|--------|
| 92  | Fosthiazate                             | 3 | 10 | 0.9933 |
| 93  | Furathiocarb                            | 3 | 10 | 0.9999 |
| 94  | Gibberellic acid<br>(+NH <sub>4</sub> ) | 3 | 10 | -      |
| 95  | Gibberellic acid(-)                     | 3 | 10 | 0.9926 |
| 96  | Halosulfuron-<br>methyl                 | 3 | 10 | 0.9996 |
| 97  | Haloxifop                               | 3 | 10 | 0.9978 |
| 98  | Hexaconazole                            | 3 | 10 | 0.9991 |
| 99  | Hexaflumuron(-)                         | 3 | 10 | 0.9912 |
| 100 | Hexaflumuron                            | 3 | 10 | 0.9912 |
| 101 | Hexazinone                              | 3 | 10 | 0.9929 |
| 102 | Hexythiazox                             | 3 | 10 | 0.9997 |
| 103 | Imazalil                                | 3 | 10 | 0.9967 |
| 104 | Imazosulfuron                           | 3 | 10 | 0.9994 |
| 105 | Imicyafos                               | 3 | 10 | 0.9900 |
| 106 | Imidacloprid                            | 3 | 10 | 0.9999 |
| 107 | Inabenfide                              | 3 | 10 | 0.9974 |
| 108 | Iprobenfos                              | 3 | 10 | 0.9994 |
| 109 | Iprovalicarb                            | 3 | 10 | 0.9967 |
| 110 | Isoprocab                               | 3 | 10 | 0.9998 |
| 111 | Isoprothiolane                          | 3 | 10 | 0.9911 |
| 112 | Isopyrazam                              | 3 | 10 | 0.9952 |
| 113 | Kresoxim-methyl                         | 3 | 10 | 0.9900 |
| 114 | Linuron                                 | 3 | 10 | 0.9933 |
| 115 | Lufenuron                               | 3 | 10 | 0.9976 |
| 116 | Lufenuron(-)                            | 3 | 10 | 0.9918 |
| 117 | Malathion                               | 3 | 10 | 0.9965 |
| 118 | Mandipropamid                           | 3 | 10 | 0.9917 |
| 119 | Mefenacet                               | 3 | 10 | 0.9980 |
| 120 | Mepanipyrim                             | 3 | 10 | 0.9926 |
| 121 | Mepronil                                | 3 | 10 | 0.9913 |
| 122 | Metalaxyl                               | 3 | 10 | 0.9935 |
| 123 | Metamifop                               | 3 | 10 | 0.9976 |
| 124 | Metazosulfuron                          | 3 | 10 | 0.9976 |
| 125 | Metconazole                             | 3 | 10 | 0.9999 |
| 126 | Methabenzthiazuron                      | 3 | 10 | 0.9986 |
| 127 | Methiocarb                              | 3 | 10 | 0.9906 |
| 128 | Methomyl                                | 3 | 10 | 0.9942 |
| 129 | Methoxyfenozone                         | 3 | 10 | 0.9910 |
| 130 | Metobromuron                            | 3 | 10 | 0.9955 |
| 131 | Metolcarb                               | 3 | 10 | 0.9999 |
| 132 | Metrafenone                             | 3 | 10 | 0.9969 |
| 133 | Mevinphos                               | 3 | 10 | 0.9976 |
| 134 | Milbemectin A3                          | 3 | 10 | 0.9996 |
| 135 | Milbemectin A4                          | 3 | 10 | 0.9989 |
| 136 | Molinate                                | 3 | 10 | 0.9988 |
| 137 | Monocrotophos                           | 3 | 10 | 0.9906 |
| 138 | Myclobutanil                            | 3 | 10 | 0.9985 |
| 139 | Napropamide                             | 3 | 10 | 0.9990 |
| 140 | Nicosulfuron                            | 3 | 10 | 0.9992 |
| 141 | Novaluron                               | 3 | 10 | 0.9990 |
| 142 | Nuarimol                                | 3 | 10 | 0.9993 |
| 143 | Ofurace                                 | 3 | 10 | 0.9946 |
| 144 | Omethoate                               | 3 | 10 | 0.9973 |
| 145 | Oxadiazon                               | 3 | 10 | 0.9962 |
| 146 | Oxadixyl                                | 3 | 10 | 0.9969 |

|     |                        |   |    |        |
|-----|------------------------|---|----|--------|
| 147 | Oxamyl                 | 3 | 10 | 0.9976 |
| 148 | Oxaziclomefon          | 3 | 10 | 0.9917 |
| 149 | Paclobutrazole         | 3 | 10 | 0.9963 |
| 150 | Penconazole            | 3 | 10 | 0.9959 |
| 151 | Pencycuron             | 3 | 10 | 0.9923 |
| 152 | Penoxsulam             | 3 | 10 | 0.9990 |
| 153 | Pentoxazone            | 3 | 10 | 0.9916 |
| 154 | Phenthoate             | 3 | 10 | 0.9926 |
| 155 | Phosphamidone          | 3 | 10 | 0.9998 |
| 156 | Phoxim                 | 3 | 10 | 0.9909 |
| 157 | Piperophos             | 3 | 10 | 0.9907 |
| 158 | Pirimicarb             | 3 | 10 | 0.9946 |
| 159 | Pirimiphos-methyl      | 3 | 10 | 0.9968 |
| 160 | Probenazole            | 3 | 10 | 0.9907 |
| 161 | Profenofos             | 3 | 10 | 0.9942 |
| 162 | Propamocarb            | 3 | 10 | 0.9984 |
| 163 | Propanil               | 3 | 10 | 0.9925 |
| 164 | Propaquizafop          | 3 | 10 | 0.9903 |
| 165 | Propoxur               | 3 | 10 | 0.9944 |
| 166 | Pyraclifos             | 3 | 10 | 0.9965 |
| 167 | Pyraclostrobin         | 3 | 10 | 0.9980 |
| 168 | Pyrazolate             | 3 | 10 | 0.9950 |
| 169 | Pyrazophos             | 3 | 10 | 0.9994 |
| 170 | Pyribenzoxim           | 3 | 10 | 0.9930 |
| 171 | Pyributicarb           | 3 | 10 | 0.9958 |
| 172 | Pyridaben              | 3 | 10 | 0.9980 |
| 173 | Pyridaphenthion        | 3 | 10 | 0.9912 |
| 174 | Pyrifluquinazon        | 3 | 10 | 0.9919 |
| 175 | Pyriftalid             | 3 | 10 | 0.9929 |
| 176 | Pyrimethanil           | 3 | 10 | 0.9998 |
| 177 | Pyrimidifen            | 3 | 10 | 0.9922 |
| 178 | (E)-Pyriminobac-methyl | 3 | 10 | 0.9901 |
| 179 | (Z)-Pyriminobac-methyl | 3 | 10 | 0.9998 |
| 180 | Pyrimisulfan           | 3 | 10 | 0.9994 |
| 181 | Pyriproxyfen           | 3 | 10 | 0.9908 |
| 182 | Pyroquilon             | 3 | 10 | 0.9905 |
| 183 | Quinalphos             | 3 | 10 | 0.9952 |
| 184 | Quinmerac              | 3 | 10 | 0.9902 |
| 185 | Quinoclamine           | 3 | 10 | 0.9984 |
| 186 | Quizalofop-ethyl       | 3 | 10 | 0.9966 |
| 187 | Saflufenacil           | 3 | 10 | 0.9974 |
| 188 | Sethoxydim             | 3 | 10 | 0.9910 |
| 189 | Spinetoram(J)          | 3 | 10 | 0.9999 |
| 190 | Spinetoram(L)          | 3 | 10 | 0.9998 |
| 191 | Spirodiclofen          | 3 | 10 | 0.9996 |
| 192 | Spirotetramat          | 3 | 10 | 0.9983 |
| 193 | Spirotetramat-enol     | 3 | 10 | 0.9943 |
| 194 | Sulfoxaflor            | 3 | 10 | 0.9930 |
| 195 | Tebuconazole           | 3 | 10 | 0.9996 |
| 196 | Tebufozide             | 3 | 10 | 0.9991 |
| 197 | Tebuconpyrad           | 3 | 10 | 0.9908 |
| 198 | Teflubenzuron          | 3 | 10 | 0.9982 |
| 199 | Terbuthylazine         | 3 | 10 | 0.9903 |
| 200 | Tetraconazole          | 3 | 10 | 0.9983 |
| 201 | Thenylchlor            | 3 | 10 | 0.9985 |

|     |                       |   |    |        |
|-----|-----------------------|---|----|--------|
| 202 | Thiabendazole         | 3 | 10 | 0.9948 |
| 203 | Thiacloprid           | 3 | 10 | 0.9962 |
| 204 | Thiamethoxam          | 3 | 10 | 0.9915 |
| 205 | Thiazopyr             | 3 | 10 | 0.9921 |
| 206 | Thidiazuron           | 3 | 10 | 0.9998 |
| 207 | Thifensulfuron-methyl | 3 | 10 | 0.9973 |
| 208 | Thiobencarb           | 3 | 10 | 0.9914 |
| 209 | Thiodicarb            | 3 | 10 | 0.9935 |
| 210 | Tiadinil(-)           | 3 | 10 | 0.9969 |
| 211 | Tiadinil              | 3 | 10 | 0.9942 |
| 212 | Triadimefon           | 3 | 10 | 0.9943 |
| 213 | Triazophos            | 3 | 10 | 0.9911 |
| 214 | Tricyclazole          | 3 | 10 | 0.9909 |
| 215 | Trifloxystrobin       | 3 | 10 | 0.9924 |
| 216 | Triflumizole          | 3 | 10 | 0.9983 |
| 217 | Triflumuron           | 3 | 10 | 0.9931 |
| 218 | Uniconazole           | 3 | 10 | 0.9986 |
| 219 | Vamidothion           | 3 | 10 | 0.9902 |

Table S5. Recoveries of the first 83 pesticides in the untreated soil using GC-MS/MS (n=3).

| No | Pesticides                  | soil        |      |               |      |
|----|-----------------------------|-------------|------|---------------|------|
|    |                             | Low (10ppb) |      | High (50 ppb) |      |
|    |                             | Rec.        | RSD  | Rec.          | RSD  |
| 41 | Difenoconazole              | 111.11      | 12.4 | 96.05         | 5.8  |
| 42 | Dimethoate                  | 108.23      | 4.7  | 91.44         | 3.7  |
| 43 | Dimethylvinphos(E)          | 104.94      | 1.2  | 95.64         | 4.1  |
| 44 | Dimethylvinphos(Z)          | 102.88      | 0.7  | 96.54         | 2.9  |
| 45 | Diphenylamine               | 85.19       | 8.8  | 101.24        | 5.9  |
| 46 | Disulfoton                  | 92.59       | 7.4  | 93.17         | 5.8  |
| 47 | Endosulfan sulfate          | 102.88      | 6.8  | 99.34         | 2.9  |
| 48 | Endosulfan-alpha            | 96.30       | 4.6  | 102.14        | 4.6  |
| 49 | Endosulfan-beta             | 102.47      | 2.4  | 94.82         | 0.9  |
| 50 | Endrin                      | 107.00      | 6.6  | 96.63         | 2.0  |
| 51 | EPN                         | 109.05      | 9.5  | 91.69         | 0.9  |
| 52 | Epoxiconazole               | 104.53      | 3.8  | 95.80         | 0.9  |
| 53 | Ethalfuralin                | 94.65       | 7.2  | 97.94         | 3.6  |
| 54 | Ethion                      | 110.70      | 1.7  | 95.14         | 2.2  |
| 55 | Etridiazole                 | 95.47       | 5.4  | 95.47         | 12.4 |
| 56 | Fenclorim                   | 92.18       | 6.6  | 96.71         | 4.0  |
| 57 | Fenitrothion                | 107.82      | 6.3  | 92.35         | 2.8  |
| 58 | Fenothiocarb                | 102.06      | 1.8  | 97.20         | 0.5  |
| 59 | Fenoxanil                   | 103.29      | 3.8  | 95.31         | 6.5  |
| 60 | Fenpropathrin               | 112.76      | 1.7  | 95.80         | 1.6  |
| 61 | Fenthion                    | 95.89       | 2.0  | 93.58         | 2.3  |
| 62 | Fenvalerate                 | 109.05      | 4.6  | 93.33         | 0.8  |
| 63 | Fipronil                    | 109.05      | 3.5  | 93.99         | 2.2  |
| 64 | Flucythrinate               | 109.47      | 1.7  | 94.07         | 0.8  |
| 65 | Flumioxazine                | 104.12      | 4.9  | 92.18         | 2.4  |
| 66 | Fluopyram                   | 105.76      | 3.6  | 96.96         | 1.7  |
| 67 | Fonofos                     | 94.24       | 5.3  | 96.46         | 3.3  |
| 68 | Fthalide                    | 107.41      | 4.1  | 97.45         | 0.8  |
| 69 | Halfenprox                  | 115.64      | 0.6  | 90.78         | 0.6  |
| 70 | Heptachlor                  | 99.59       | 3.1  | 97.53         | 2.6  |
| 71 | Heptachlor-exo-epoxide      | 97.12       | 3.9  | 96.46         | 4.4  |
| 72 | Imibenconazole              | 93.00       | 2.8  | 87.90         | 7.6  |
| 73 | Indanofan                   | 108.64      | 5.2  | 98.68         | 7.7  |
| 74 | Indoxacarb                  | 99.59       | 11.2 | 94.57         | 3.9  |
| 75 | Iprodione                   | 87.65       | 10.2 | 98.19         | 8.4  |
| 76 | Isazofos                    | 102.06      | 7.0  | 95.80         | 0.3  |
| 77 | Isofenphos                  | 99.18       | 3.6  | 99.34         | 1.4  |
| 78 | Mecarbam                    | 105.76      | 1.3  | 105.51        | 5.9  |
| 79 | Methidathion                | 109.47      | 1.7  | 96.05         | 0.7  |
| 80 | Metolachlor (S-Metolachlor) | 100.00      | 6.2  | 97.12         | 2.6  |
| 81 | Metribuzin                  | 107.82      | 0.7  | 98.11         | 3.4  |
| 82 | Oxyfluorfen                 | 108.23      | 3.7  | 93.42         | 0.3  |
| 83 | Parathion-ethyl             | 109.88      | 1.9  | 93.66         | 0.8  |
| 84 | Parathion-methyl            | 109.05      | 5.8  | 93.17         | 3.1  |
| 85 | Pendimethalin               | 105.35      | 6.5  | 94.65         | 1.7  |
| 86 | Penthiopyrad                | 104.53      | 3.6  | 95.80         | 0.7  |
| 87 | Permethrin                  | 109.05      | 4.0  | 97.12         | 1.5  |
| 88 | Phenothrin                  | 108.64      | 11.5 | 102.88        | 6.7  |
| 89 | Phorate                     | 88.89       | 8.3  | 99.26         | 4.9  |
| 90 | Phosalone                   | 106.58      | 0.7  | 93.91         | 1.1  |

|     |                    |        |      |        |     |
|-----|--------------------|--------|------|--------|-----|
| 91  | Picoxystrobin      | 101.65 | 2.8  | 97.37  | 3.8 |
| 92  | Piperonyl bitoxide | 107.41 | 3.0  | 93.91  | 0.6 |
| 93  | Pirimiphos-ethyl   | 106.17 | 5.3  | 97.04  | 0.4 |
| 94  | Pretilachlor       | 99.59  | 5.9  | 97.04  | 1.7 |
| 95  | Prochloraz         | 115.64 | 6.9  | 92.35  | 6.5 |
| 96  | Procymidone        | 100.00 | 3.3  | 94.98  | 0.8 |
| 97  | Promecarb          | 96.30  | 5.6  | 98.19  | 2.8 |
| 98  | Prometryn          | 102.47 | 2.4  | 96.3   | 1.5 |
| 99  | Propachlor         | 95.47  | 7.4  | 99.59  | 2.7 |
| 100 | Propazine          | 99.18  | 3.1  | 97.28  | 2.4 |
| 101 | Propiconazole      | 99.59  | 2.6  | 96.54  | 0.8 |
| 102 | Propisochlor       | 100.82 | 3.1  | 96.13  | 2.2 |
| 103 | Propyzamide        | 100.82 | 3.5  | 97.86  | 2.2 |
| 104 | Prothiofos         | 101.24 | 4.4  | 97.28  | 3.0 |
| 105 | Pyridalyl          | 105.76 | 3.8  | 93.91  | 1.9 |
| 106 | Quintozene         | 105.76 | 6.4  | 97.20  | 7.8 |
| 107 | Silafluofen        | 101.24 | 5.3  | 94.57  | 0.9 |
| 108 | Simazine           | 104.53 | 15.2 | 111.03 | 4.8 |
| 109 | Simeconazole       | 103.29 | 4.5  | 96.13  | 1.2 |
| 110 | Simetryn           | 108.64 | 12.3 | 91.93  | 4.4 |
| 111 | Spiromesifen       | 107.0  | 1.8  | 95.14  | 0.3 |
| 112 | Tebupirimfos       | 86.83  | 12.1 | 99.01  | 7.0 |
| 113 | Tefluthrin         | 95.47  | 8.6  | 95.97  | 3.4 |
| 114 | Terbufos           | 97.94  | 2.9  | 96.38  | 4.1 |
| 115 | Terbutryn          | 97.53  | 3.3  | 95.64  | 2.1 |
| 116 | Tetradifon         | 105.76 | 3.4  | 97.12  | 0.4 |
| 117 | Thifluzamide       | 106.58 | 1.3  | 95.89  | 1.0 |
| 118 | Tolclofos-methyl   | 93.00  | 4.3  | 100.33 | 3.2 |
| 119 | Triadimenol        | 93.42  | 6.8  | 96.63  | 1.5 |
| 120 | Tri-allate         | 104.94 | 7.2  | 97.20  | 3.0 |
| 121 | Trifluralin        | 99.59  | 8.1  | 98.19  | 4.7 |
| 122 | Vinclozolin        | 102.47 | 4.3  | 96.30  | 2.9 |
| 123 | Zoxamide           | 108.6  | 3.9  | 94.90  | 3.9 |

Table S6. Recoveries of 179 pesticides in the untreated soil using LC-MS/MS (n=3).

| No | Pesticides       | soil        |     |               |      |
|----|------------------|-------------|-----|---------------|------|
|    |                  | Low (10ppb) |     | High (50 ppb) |      |
|    |                  | Rec.        | RSD | Rec.          | RSD  |
| 41 | Demeton-S-methyl | 76.8        | 4.5 | 95.2          | 3.0  |
| 42 | Diazinon         | 84.2        | 2.6 | 85.1          | 3.9  |
| 43 | Dichlorvos(DDVP) | 100.4       | 7.6 | 104.7         | 2.7  |
| 44 | Diethofencarb    | 82.2        | 1.6 | 84.8          | 5.5  |
| 45 | Diflubenzuron    | 88.9        | 8.2 | 99.7          | 2.2  |
| 46 | Dimepiperate     | 82.4        | 0.8 | 88.1          | 2.0  |
| 47 | Dimethametryn    | 86.6        | 2.4 | 86.7          | 3.6  |
| 48 | Dimethenamid     | 86.0        | 4.8 | 101.0         | 1.7  |
| 49 | Dimethomorph(E)  | 93.9        | 0.6 | 83.9          | 2.5  |
| 50 | Dimethomorph(Z)  | 83.1        | 3.1 | 89.1          | 3.9  |
| 51 | Diniconazole     | 95.9        | 6.6 | 77.7          | 8.7  |
| 52 | Dinotefuran      | 83.5        | 2.6 | 101.9         | 4.2  |
| 53 | Diphenamid       | 97.8        | 9.5 | 100.5         | 4.9  |
| 54 | Dithiopyr        | 87.1        | 5.1 | 102.1         | 5.1  |
| 55 | Diuron           | 84.9        | 2.9 | 94.7          | 2.9  |
| 56 | Edifenphos       | 79.2        | 2.2 | 87.5          | 2.2  |
| 57 | Esprocarb        | 80.3        | 2.1 | 96.8          | 0.8  |
| 58 | Ethaboxam        | 76.8        | 6.3 | 85.7          | 2.8  |
| 59 | Ethiofencarb     | 80.2        | 2.0 | 81.7          | 2.7  |
| 60 | Ethoprophos      | 75.5        | 3.4 | 89.5          | 4.6  |
| 61 | Ethoxysulfuron   | 84.2        | 9.2 | 88.1          | 1.4  |
| 62 | Etofenprox       | 81.3        | 2.0 | 78.4          | 1.3  |
| 63 | Etoxazole        | 84.4        | 2.0 | 87.0          | 1.9  |
| 64 | Etrimfos         | 85.0        | 2.8 | 87.5          | 1.7  |
| 65 | Famoxadone       | 115.5       | 5.7 | 85.5          | 4.9  |
| 66 | Fenamiphos       | 81.5        | 7.7 | 90.2          | 3.6  |
| 67 | Fenarimol        | 108.0       | 9.6 | 81.7          | 2.4  |
| 68 | Fenazaquin       | 82.8        | 1.5 | 85.0          | 1.0  |
| 69 | Fenbuconazole    | 81.9        | 3.6 | 89.4          | 1.5  |
| 70 | Fenhexamid       | 92.1        | 6.0 | 91.1          | 3.9  |
| 71 | Fenobucarb       | 90.6        | 5.3 | 85.6          | 3.1  |
| 72 | Fenoxaprop-ethyl | 79.6        | 3.7 | 89.9          | 2.1  |
| 73 | Fenoxycarb       | 90.8        | 9.0 | 92.7          | 5.7  |
| 74 | Fenpyroximate    | 86.8        | 1.3 | 79.3          | 0.7  |
| 75 | Fentrazamide     | 85.1        | 5.1 | 89.3          | 4.8  |
| 76 | Ferimzone(E)     | 107.0       | 0.7 | 95.9          | 5.1  |
| 77 | Ferimzone(Z)     | 79.1        | 3.2 | 78.7          | 3.8  |
| 78 | Flonicamid       | 77.4        | 3.5 | 88.8          | 5.8  |
| 79 | Fluacrypyrim     | 82.0        | 1.3 | 85.3          | 2.1  |
| 80 | Flubendiamide(-) | 89.1        | 9.1 | 107.3         | 5.8  |
| 81 | Flubendiamide    | 97.4        | 7.0 | 81.1          | 12.3 |
| 82 | Flucetosulfuron  | 82.5        | 8.3 | 82.6          | 10.9 |
| 83 | Fludioxonil      | 115.3       | 3.7 | 104.8         | 8.8  |
| 84 | Flufenacet       | 82.2        | 1.8 | 101.7         | 2.5  |
| 85 | Flufenoxuron     | 91.1        | 2.1 | 77.6          | 1.4  |
| 86 | Fluopicolide     | 86.2        | 6.1 | 107.0         | 1.1  |
| 87 | Fluquinconazole  | 90.2        | 5.1 | 84.9          | 7.6  |
| 88 | Flusilazole      | 106.0       | 6.0 | 86.3          | 6.0  |
| 89 | Flutolanil       | 102.3       | 9.6 | 87.1          | 1.1  |
| 90 | Fluxapyroxad     | 77.2        | 9.3 | 90.0          | 3.1  |
| 91 | Forchlorfenuron  | 81.1        | 6.2 | 82.3          | 3.3  |
| 92 | Fosthiazate      | 86.5        | 2.1 | 97.4          | 1.1  |

|     |                        |       |      |       |      |
|-----|------------------------|-------|------|-------|------|
| 93  | Furathiocarb           | 82.3  | 1.7  | 79.0  | 2.3  |
| 94  | Gibberellic acid(+NH4) | -     | -    | -     | -    |
| 95  | Gibberellic acid(-)    | 97.3  | 2.6  | 115.9 | 2.4  |
| 96  | Halosulfuron-methyl    | 85.6  | 0.6  | 92.4  | 4.2  |
| 97  | Haloxifop              | 96.9  | 15.8 | 104.7 | 9.3  |
| 98  | Hexaconazole           | 92.6  | 3.7  | 85.1  | 2.6  |
| 99  | Hexaflumuron(-)        | 103.2 | 9.6  | 108.7 | 3.2  |
| 100 | Hexaflumuron           | 98.6  | 15.8 | 85.2  | 2.8  |
| 101 | Hexazinone             | 82.3  | 4.6  | 91.7  | 0.2  |
| 102 | Hexythiazox            | 86.5  | 3.7  | 83.2  | 0.8  |
| 103 | Imazalil               | 94.6  | 10.4 | 87.9  | 1.5  |
| 104 | Imazosulfuron          | 84.6  | 5.9  | 83.0  | 3.9  |
| 105 | Imicyafos              | 103.2 | 2.3  | 93.7  | 3.1  |
| 106 | Imidacloprid           | 90.8  | 3.1  | 95.0  | 11.6 |
| 107 | Inabenfide             | 92.8  | 1.9  | 91.6  | 7.4  |
| 108 | Iprobenfos             | 81.7  | 2.2  | 83.1  | 1.9  |
| 109 | Iprovalicarb           | 83.5  | 2.4  | 87.3  | 0.7  |
| 110 | Isoprocab              | 84.3  | 3.1  | 82.8  | 3.5  |
| 111 | Isoprothiolane         | 90.3  | 2.4  | 91.2  | 1.0  |
| 112 | Isopyrazam             | 87.8  | 3.5  | 91.0  | 3.3  |
| 113 | Kresoxim-methyl        | 82.8  | 5.5  | 89.3  | 3.6  |
| 114 | Linuron                | 88.7  | 4.4  | 95.1  | 1.8  |
| 115 | Lufenuron              | 87.3  | 5.9  | 100.4 | 4.0  |
| 116 | Lufenuron(-)           | 93.4  | 9.1  | 104.6 | 0.8  |
| 117 | Malathion              | 74.4  | 7.4  | 90.7  | 3.3  |
| 118 | Mandipropamid          | 95.1  | 8.3  | 100.2 | 9.5  |
| 119 | Mefenacet              | 83.6  | 6.1  | 88.4  | 2.2  |
| 120 | Mepanipyrim            | 93.4  | 2.0  | 93.0  | 4.6  |
| 121 | Mepronil               | 82.0  | 2.4  | 100.4 | 2.3  |
| 122 | Metalaxyl              | 84.8  | 3.7  | 92.8  | 0.3  |
| 123 | Metamifop              | 86.7  | 4.7  | 86.8  | 4.2  |
| 124 | Metazosulfuron         | 114.5 | 5.1  | 83.8  | 2.6  |
| 125 | Metconazole            | 86.2  | 2.5  | 81.5  | 1.3  |
| 126 | Methabenzthiazuron     | 83.7  | 1.7  | 85.0  | 1.7  |
| 127 | Methiocarb             | 82.1  | 0.8  | 96.7  | 2.3  |
| 128 | Methomyl               | 85.5  | 5.0  | 95.7  | 1.0  |
| 129 | Methoxyfenozide        | 75.6  | 6.8  | 94.0  | 0.5  |
| 130 | Metobromuron           | 80.3  | 3.6  | 92.3  | 3.3  |
| 131 | Metolcarb              | 90.7  | 3.7  | 83.9  | 3.7  |
| 132 | Metrafenone            | 81.1  | 2.5  | 88.8  | 3.2  |
| 133 | Mevinphos              | 86.1  | 4.5  | 86.4  | 3.9  |
| 134 | Milbemectin A3         | 94.0  | 3.8  | 78.7  | 1.5  |
| 135 | Milbemectin A4         | 85.9  | 2.2  | 86.5  | 3.6  |
| 136 | Molinate               | 88.7  | 7.6  | 82.7  | 2.7  |
| 137 | Monocrotophos          | 101.8 | 10.9 | 108.4 | 3.1  |
| 138 | Myclobutanil           | 84.6  | 2.7  | 85.3  | 0.9  |
| 139 | Napropamide            | 84.3  | 4.2  | 85.6  | 0.3  |
| 140 | Nicosulfuron           | 87.8  | 3.2  | 80.2  | 1.6  |
| 141 | Novaluron              | 88.5  | 1.4  | 78.3  | 3.1  |
| 142 | Nuarimol               | 83.8  | 2.0  | 78.5  | 9.0  |
| 143 | Ofurace                | 82.1  | 3.1  | 95.4  | 4.2  |
| 144 | Omethoate              | 92.0  | 7.1  | 90.3  | 3.4  |
| 145 | Oxadiazon              | 110.8 | 3.7  | 93.6  | 7.8  |
| 146 | Oxadixyl               | 82.9  | 6.3  | 91.8  | 2.2  |
| 147 | Oxamyl                 | 82.7  | 3.8  | 86.3  | 0.8  |



|     |                       |       |      |       |      |
|-----|-----------------------|-------|------|-------|------|
| 148 | Oxaziclomefon         | 80.3  | 3.0  | 88.9  | 1.3  |
| 149 | Paclobutrazole        | 92.7  | 8.7  | 92.6  | 4.2  |
| 150 | Penconazole           | 85.7  | 6.1  | 88.6  | 3.4  |
| 151 | Pencycuron            | 79.2  | 0.9  | 86.5  | 1.7  |
| 152 | Penoxsulam            | 84.5  | 2.9  | 84.8  | 2.8  |
| 153 | Pentoxazone           | 76.2  | 5.7  | 71.4  | 9.1  |
| 154 | Phenthoate            | 86.4  | 11.7 | 89.7  | 2.1  |
| 155 | Phosphamidone         | 89.0  | 8.1  | 80.8  | 2.9  |
| 156 | Phoxim                | 79.1  | 3.6  | 95.1  | 2.3  |
| 157 | Piperophos            | 80.2  | 1.5  | 92.8  | 1.4  |
| 158 | Pirimicarb            | 78.3  | 2.0  | 84.4  | 1.6  |
| 159 | Pirimiphos-methyl     | 81.9  | 1.0  | 85.9  | 3.5  |
| 160 | Probenazole           | 87.1  | 4.5  | 99.8  | 3.4  |
| 161 | Profenofos            | 85.2  | 5.4  | 101.6 | 2.6  |
| 162 | Propamocarb           | 83.9  | 4.7  | 89.8  | 12.0 |
| 163 | Propanil              | 111.7 | 1.5  | 100.5 | 13.3 |
| 164 | Propaquizafop         | 82.7  | 4.9  | 98.5  | 1.8  |
| 165 | Propoxur              | 82.5  | 1.4  | 92.6  | 0.6  |
| 166 | Pyraclufos            | 75.7  | 9.7  | 92.8  | 9.0  |
| 167 | Pyraclostrobin        | 81.0  | 1.5  | 87.6  | 2.8  |
| 168 | Pyrazolate            | 83.3  | 5.3  | 90.8  | 3.3  |
| 169 | Pyrazophos            | 82.7  | 2.3  | 82.8  | 1.5  |
| 170 | Pyribenzoxim          | 83.8  | 6.6  | 96.1  | 1.4  |
| 171 | Pyributicarb          | 78.1  | 1.1  | 87.4  | 0.1  |
| 172 | Pyridaben             | 82.3  | 1.1  | 80.9  | 0.4  |
| 173 | Pyridaphenthion       | 82.9  | 3.7  | 106.4 | 4.9  |
| 174 | Pyrifluquinazon       | 79.1  | 4.3  | 88.2  | 5.2  |
| 175 | Pyriftalid            | 87.2  | 4.9  | 97.1  | 2.3  |
| 176 | Pyrimethanil          | 82.6  | 4.0  | 82.4  | 1.2  |
| 177 | Pyrimidifen           | 81.7  | 0.9  | 95.6  | 0.8  |
| 178 | Pyriminobac-methyl(E) | 93.9  | 3.8  | 87.4  | 2.0  |
| 179 | Pyriminobac-methyl(Z) | 86.3  | 2.5  | 84.5  | 2.9  |
| 180 | Pyrimisulfan          | 85.9  | 3.8  | 84.0  | 1.5  |
| 181 | Pyriproxyfen          | 79.1  | 1.4  | 90.4  | 1.0  |
| 182 | Pyroquilon            | 87.8  | 4.0  | 99.6  | 0.9  |
| 183 | Quinalphos            | 79.2  | 2.5  | 88.6  | 5.7  |
| 184 | Quinmerac             | 81.1  | 2.6  | 94.1  | 0.9  |
| 185 | Quinoclamine          | 94.5  | 3.8  | 101.4 | 4.5  |
| 186 | Quizalofop-ethyl      | 80.1  | 3.6  | 88.6  | 2.4  |
| 187 | Saflufenacil          | 94.3  | 9.6  | 81.5  | 1.8  |
| 188 | Sethoxydim            | 72.8  | 2.0  | 96.1  | 4.5  |
| 189 | Spinetoram(J)         | 90.6  | 10.4 | 87.8  | 2.4  |
| 190 | Spinetoram(L)         | 75.6  | 6.0  | 102.4 | 2.3  |
| 191 | Spirodiclofen         | 83.5  | 1.9  | 82.7  | 1.4  |
| 192 | Spirotetramat         | 81.3  | 5.1  | 87.5  | 2.5  |
| 193 | Spirotetramat-enol    | 83.3  | 3.5  | 89.8  | 4.2  |
| 194 | Sulfoxaflor           | 88.8  | 5.5  | 110.4 | 6.1  |
| 195 | Tebuconazole          | 88.4  | 9.6  | 86.3  | 6.8  |
| 196 | Tebufenozide          | 87.5  | 2.3  | 83.6  | 1.7  |
| 197 | Tebufenpyrad          | 82.4  | 2.0  | 95.9  | 3.3  |
| 198 | Teflubenzuron         | 83.7  | 4.5  | 90.1  | 0.9  |
| 199 | Terbuthylazine        | 77.6  | 3.3  | 104.6 | 3.9  |
| 200 | Tetraconazole         | 76.2  | 2.8  | 83.1  | 5.6  |
| 201 | Thenylchlor           | 84.8  | 2.8  | 86.7  | 3.4  |
| 202 | Thiabendazole         | 73.3  | 2.2  | 85.4  | 1.6  |

|     |                       |       |      |       |     |
|-----|-----------------------|-------|------|-------|-----|
| 203 | Thiacloprid           | 81.7  | 3.3  | 90.7  | 0.8 |
| 204 | Thiamethoxam          | 78.2  | 3.3  | 102.4 | 0.9 |
| 205 | Thiazopyr             | 77.2  | 9.8  | 91.2  | 5.6 |
| 206 | Thidiazuron           | 81.9  | 13.7 | 80.6  | 3.7 |
| 207 | Thifensulfuron-methyl | 85.7  | 3.2  | 93.6  | 4.7 |
| 208 | Thiobencarb           | 78.0  | 6.0  | 94.3  | 1.8 |
| 209 | Thiodicarb            | 79.3  | 4.7  | 93.8  | 0.9 |
| 210 | Tiadinil(-)           | 74.2  | 3.7  | 85.4  | 2.7 |
| 211 | Tiadinil              | 115.6 | 15.4 | 87.3  | 0.8 |
| 212 | Triadimefon           | 80.5  | 3.1  | 91.4  | 4.3 |
| 213 | Triazophos            | 78.6  | 3.9  | 94.8  | 1.9 |
| 214 | Tricyclazole          | 87.5  | 6.8  | 108.5 | 1.2 |
| 215 | Trifloxystrobin       | 79.8  | 2.3  | 95.7  | 0.9 |
| 216 | Triflumizole          | 80.0  | 3.8  | 84.5  | 1.2 |
| 217 | Triflumuron           | 80.1  | 10.0 | 91.1  | 3.1 |
| 218 | Uniconazole           | 91.0  | 7.7  | 92.2  | 5.9 |
| 219 | Vamidothion           | 78.8  | 1.3  | 96.9  | 2.2 |
